# Supplementary material
Source: Research Square preprint supplement (doi:10.21203/rs.3.rs-10055740/v1)
Supplement: Supplementary file 1 [file 1323d0ac831b9c2f9a8700d3.xlsx]

## Sheet: Sheet1
		Table 1 The treatment regimen
		Date	Treatment Process		Outcomes and Follow-up
		2018.04	Palliative resection of the left renal tumor. Followed by sorafenib treatment.		/
		2019.06	Follow-up chest CT revealed increased bilateral pulmonary nodules. A new lymph node shadow was observed below the trachea. Initiated sorafenib for pulmonary metastases.		Treatment efficacy was evaluated as stable disease (SD).
		2022.11	Experienced a paroxysmal dry cough, followed by hemoptysis and dizziness.CT revealed a new right adrenal lesion, significant enlargement of bilateral pulmonary nodules. The nodules in the right bronchus, right pulmonary hilum, and mediastinal lymph nodes were enlarged and fused. Brain MRI showed a right frontal lobe metastasis.		Disease progression, PFS 41 months.
		2022.12-2023.01	Intensity modulated radiotherapy (6MV X-ray SF-IMRT Dt95% PGTV: 6000cGy/20f/29d) for brain metastases, combined with sunitinib (50 mg qd) and IL-2 (2 million IU on days 1–5).		/
		2023.04	Follow-up chest CT imaging showed further progression of bilateral pulmonary nodules and enlargement of the right adrenal metastasis.		Treatment efficacy was evaluated as progressive disease (PD) , PFS 4 months.
		2023.04-2023.10	4 cycles of Bevacizumab (600 mg on day 1) combined with Camrelizumab (200 mg on day 2) were administered from April to July 2023, followed by maintenance therapy with Bevacizumab (600 mg) until October 2023.		/
		2024.01	Chest CT and head MRI showed that the metastases had increased in size compared to before, and new lesions were visible in the left frontal and temporal lobes.		Disease progression, PFS 9 months.
		2024.01-2024.10	8 cycles of Tislelizumab 200 mg + Bevacizumab 600 mg was administered.		Treatment efficacy was evaluated as partial response (PR).
		2024.12	head MRI showed a slight enlargement in the size of the left parietal lobe lesion compared to before.		/
		2024.12-2025.04	4 cycles of treatment with Tislelizumab 200 mg + Bevacizumab 600 mg was administered.		Treatment efficacy was evaluated as SD with an overall survival (OS) of approximately 6 years to date.
